# Supplementary material for: Dihydromyricetin promotes longevity and activates the transcription factors FOXO and AOP in Drosophila
Source: publisher site journal article supplement (doi:10.18632/aging.202156), 2020-12-03
Supplement: Supplementary file [file aging-v13i1-202156-supplementary-material-SD1.pdf]

SUPPLEMENTARY FIGURE

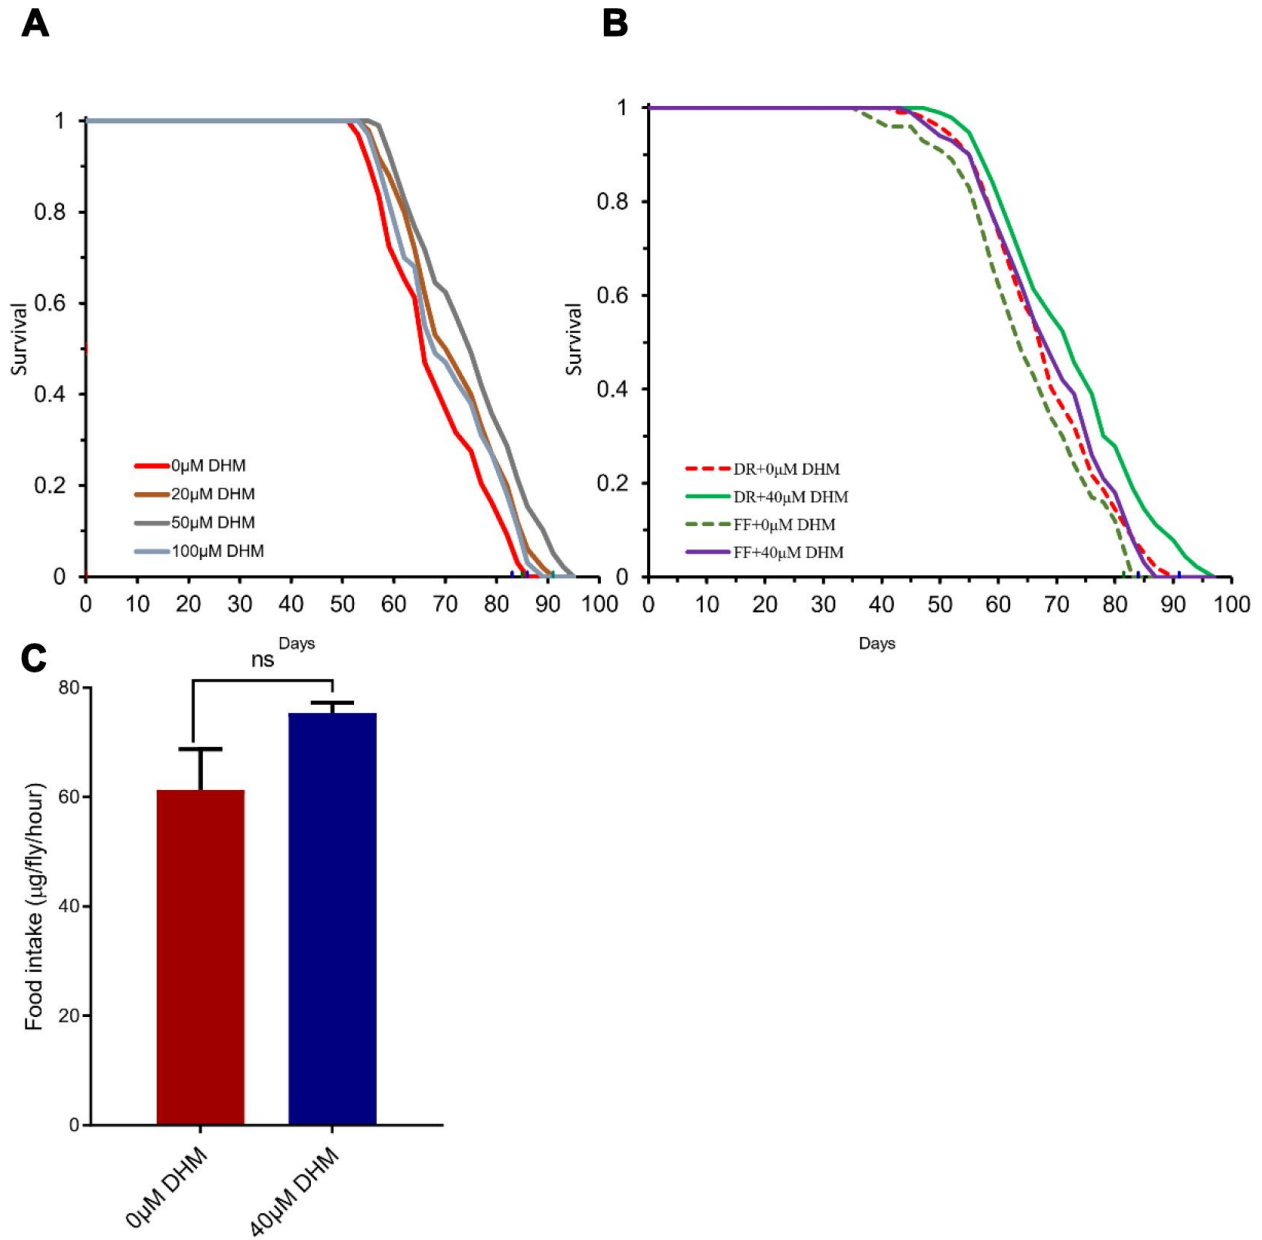

**Supplementary Figure 1. DHM can extend fly lifespan.** (A) The lifespan curves of female flies on the SYA food with 0μM, 20μM, 50μM, 100μM DHM respectively. (B) DHM extended fly lifespan on both fully fed (FF) and dietary restriction (DR) food ( $p=0.013$  and  $p=0.0033$ , log-rank test). (C) The food intake measured by the one hour feed assay (ns means there is no specific difference).
