# Supplementary material for: Dihydromyricetin promotes longevity and activates the transcription factors FOXO and AOP in Drosophila
Source: publisher site journal article supplement (doi:10.18632/aging.202156), 2020-12-03
Supplement: Supplementary file [file aging-v13i1-202156-supplementary-material-SD2.pdf]

## SUPPLEMENTARY TABLES

**Supplementary Table 1. DHM treatment extends *Drosophila* lifespans.**

A, Survival data (related to Figure 1B)

Repeat 1

| Genotype/<br>Treatment | MedLifespan<br>(days) | MaxLifespan<br>(days) | n Dead | n Censored | % Median<br>Increase | p-value(log rank)<br>vs control |
|------------------------|-----------------------|-----------------------|--------|------------|----------------------|---------------------------------|
| 0μM DHM                | 63.0                  | 85.5                  | 97     | 3          |                      |                                 |
| 10μM DHM               | 65.5                  | 84.5                  | 98     | 2          | 3.968                | 0.854633423                     |
| 40μM DHM               | 72.0                  | 94.0                  | 98     | 2          | 14.289               | 3.76843E-05                     |
| 100μM DHM              | 66.5                  | 86.5                  | 95     | 5          | 5.556                | 0.499356215                     |

Repeat 2

| Genotype/<br>Treatment | MedLifespan<br>(days) | MaxLifespan<br>(days) | n Dead | n Censored | % Median<br>Increase | p-value(log rank)<br>vs control |
|------------------------|-----------------------|-----------------------|--------|------------|----------------------|---------------------------------|
| 0μM DHM                | 52.5                  | 80.5                  | 99     | 1          |                      |                                 |
| 10μM DHM               | 59.5                  | 83.0                  | 100    | 0          | 13.46                | 0.049002524                     |
| 40μM DHM               | 64.0                  | 87.5                  | 99     | 1          | 22.12                | 4.05113E-05                     |
| 100μM DHM              | 55.0                  | 83.5                  | 100    | 0          | 4.807                | 0.169086376                     |

Repeat 3

| Genotype/<br>Treatment | MedLifespan<br>(days) | MaxLifespan<br>(days) | n Dead | n Censored | % Median<br>Increase | p-value(log rank)<br>vs control |
|------------------------|-----------------------|-----------------------|--------|------------|----------------------|---------------------------------|
| 0μM DHM                | 65.0                  | 83.0                  | 98     | 2          |                      |                                 |
| 10μM DHM               | 70.0                  | 86.0                  | 100    | 0          | 7.692                | 0.002907536                     |
| 40μM DHM               | 73.5                  | 91.0                  | 100    | 0          | 13.08                | 9.67294E-07                     |
| 100μM DHM              | 67.0                  | 85.0                  | 99     | 1          | 3.077                | 0.018283705                     |

B, Survival data (related to Figure 1E)

| Genotype/<br>Treatment          | MedLifespan<br>(days) | MaxLifespan<br>(days) | n Dead | n Censored | %Median<br>Increase | p-value (log rank)<br>vs control |
|---------------------------------|-----------------------|-----------------------|--------|------------|---------------------|----------------------------------|
| 0μM DHM                         | 59.0                  | 78.0                  | 97     | 3          |                     |                                  |
| 0μM DHM (30 days)<br>+40 μM DHM | 64.0                  | 82.5                  | 99     | 1          | 8.474               | 0.00345051                       |
| 40μM DHM                        | 69.5                  | 89.5                  | 98     | 2          | 17.80               | 1.32311E-06                      |

**Supplementary Table 2. DHM improves the tolerance of the stresses. Data are related to Figure 2.**

Survival data (related to Figure 2A)

Repeat 1

| Genotype/<br>Treatment | MedLifespan<br>(days) | MaxLifespan<br>(days) | n Dead | n Censored | % Median<br>Increase | p-value(log rank)<br>vs control |
|------------------------|-----------------------|-----------------------|--------|------------|----------------------|---------------------------------|
| 0μM DHM                | 8.5                   | 10.5                  | 100    | 0          |                      |                                 |
| 40μM DHM               | 9.5                   | 13                    | 100    | 0          | 12.5                 | 0.013031225                     |

Repeat 2

| Genotype/<br>Treatment | MedLifespan<br>(days) | MaxLifespan<br>(days) | n Dead | n Censored | % Median<br>Increase | p-value(log rank)<br>vs control |
|------------------------|-----------------------|-----------------------|--------|------------|----------------------|---------------------------------|
| 0μM DHM                | 9.5                   | 11.5                  | 100    | 0          |                      |                                 |
| 40μM DHM               | 11                    | 15.5                  | 100    | 0          | 15.79                | 2.71896E-05                     |

**Supplementary Table 3. DHM promotes the FOXO activity. Data are related to Figure 3.**

Survival data (related to Figure 3D)

| Genotype/<br>Treatment                                | MedLifespan<br>(days) | MaxLifespan<br>(days) | n Dead | n Censored | %Median<br>Increase | p-value(log<br>rank) vs<br>control                                                                       |
|-------------------------------------------------------|-----------------------|-----------------------|--------|------------|---------------------|----------------------------------------------------------------------------------------------------------|
| <i>Da<sup>GS</sup>gal4&gt; foxo RNAi</i>              | 58.5                  | 76.0                  | 99     | 1          |                     |                                                                                                          |
| <i>Da<sup>GS</sup>gal4&gt; foxo<br/>RNAi+DHM</i>      | 64.5                  | 78.5                  | 97     | 3          | 10.27               | 0.00004425                                                                                               |
| <i>Da<sup>GS</sup>gal4&gt; foxo RNAi<br/>+RU</i>      | 48.0                  | 67.0                  | 100    | 0          | -17.95              | 0.000031107                                                                                              |
| <i>Da<sup>GS</sup>gal4&gt; foxo RNAi<br/>+RU +DHM</i> | 50.5                  | 71.5                  | 97     | 3          | -13.68              | 0.00693181                                                                                               |
|                                                       |                       |                       |        |            |                     | <i>Da<sup>GS</sup>gal4&gt;foxo RNAi +RU vs<br/>Da<sup>GS</sup>gal4&gt;foxo RNAi +RU+DHM</i><br>0.0936647 |
